# Supplementary material
Source: publisher figshare collection journal article supplement (https://acs.figshare.com/ndownloader/files/4735099)
Supplement: Supplementary file 1 [file 4735099]

  
data_aw33 
  
_audit_creation_method            SHELXL-97 
_chemical_name_systematic 
; 
 ? 
; 
_chemical_name_common             ? 
_chemical_melting_point           ? 
_chemical_formula_moiety          ? 
_chemical_formula_sum 
 'C17 H33 N O4 Si' 
_chemical_formula_weight          343.53 
  
loop_ 
 _atom_type_symbol 
 _atom_type_description 
 _atom_type_scat_dispersion_real 
 _atom_type_scat_dispersion_imag 
 _atom_type_scat_source 
 'C'  'C'   0.0033   0.0016 
 'International Tables Vol C Tables 4.2.6.8 and 6.1.1.4' 
 'H'  'H'   0.0000   0.0000 
 'International Tables Vol C Tables 4.2.6.8 and 6.1.1.4' 
 'N'  'N'   0.0061   0.0033 
 'International Tables Vol C Tables 4.2.6.8 and 6.1.1.4' 
 'O'  'O'   0.0106   0.0060 
 'International Tables Vol C Tables 4.2.6.8 and 6.1.1.4' 
 'Si'  'Si'   0.0817   0.0704 
 'International Tables Vol C Tables 4.2.6.8 and 6.1.1.4' 
  
_symmetry_cell_setting            ORTHORHOMBIC 
_symmetry_space_group_name_H-M    P2(1)2(1)2(1) 
  
loop_ 
 _symmetry_equiv_pos_as_xyz 
 'x, y, z' 
 '-x+1/2, -y, z+1/2' 
 '-x, y+1/2, -z+1/2' 
 'x+1/2, -y+1/2, -z' 
  
_cell_length_a                    8.3847(17) 
_cell_length_b                    10.637(2) 
_cell_length_c                    22.556(5) 
_cell_angle_alpha                 90.00 
_cell_angle_beta                  90.00 
_cell_angle_gamma                 90.00 
_cell_volume                      2011.8(7) 
_cell_formula_units_Z             4 
_cell_measurement_temperature     293(2) 
_cell_measurement_reflns_used     ? 
_cell_measurement_theta_min       ? 
_cell_measurement_theta_max       ? 
  
_exptl_crystal_description        BLOCK 
_exptl_crystal_colour             COLOURLESS 
_exptl_crystal_size_max           0.40 
_exptl_crystal_size_mid           0.30 
_exptl_crystal_size_min           0.20 
_exptl_crystal_density_meas       ? 
_exptl_crystal_density_diffrn     1.134 
_exptl_crystal_density_method     'not measured' 
_exptl_crystal_F_000              752 
_exptl_absorpt_coefficient_mu     0.134 
_exptl_absorpt_correction_type    EMPIRICAL 
_exptl_absorpt_correction_T_min   0.9482 
_exptl_absorpt_correction_T_max   0.9736 
_exptl_absorpt_process_details    ? 
  
_exptl_special_details 
; 
 ? 
; 
  
_diffrn_ambient_temperature       293(2) 
_diffrn_radiation_wavelength      0.71073 
_diffrn_radiation_type            MoK\a 
_diffrn_radiation_source          'fine-focus sealed tube' 
_diffrn_radiation_monochromator   graphite 
_diffrn_measurement_device_type   'AFC7R RIGAKU DIFFRACTOMETER' 
_diffrn_measurement_method        'OMEGA SCAN' 
_diffrn_detector_area_resol_mean  ? 
_diffrn_standards_number          ? 
_diffrn_standards_interval_count  ? 
_diffrn_standards_interval_time   ? 
_diffrn_standards_decay_%         ? 
_diffrn_reflns_number             2042 
_diffrn_reflns_av_R_equivalents   0.0000 
_diffrn_reflns_av_sigmaI/netI     0.2488 
_diffrn_reflns_limit_h_min        0 
_diffrn_reflns_limit_h_max        9 
_diffrn_reflns_limit_k_min        -12 
_diffrn_reflns_limit_k_max        0 
_diffrn_reflns_limit_l_min        -26 
_diffrn_reflns_limit_l_max        0 
_diffrn_reflns_theta_min          2.12 
_diffrn_reflns_theta_max          25.00 
_reflns_number_total              2042 
_reflns_number_gt                 821 
_reflns_threshold_expression      >2sigma(I) 
  
_computing_data_collection        'Bruker FRAMBO' 
_computing_cell_refinement        'Bruker FRAMBO' 
_computing_data_reduction         'Bruker SHELXTL' 
_computing_structure_solution     'SHELXS-97 (Sheldrick, 1990)' 
_computing_structure_refinement   'SHELXL-97 (Sheldrick, 1997)' 
_computing_molecular_graphics     'SIEMENS SHELXTL' 
_computing_publication_material   'SIEMENS SHELXTL' 
  
_refine_special_details 
; 
 Refinement of F^2^ against ALL reflections.  The weighted R-factor wR and 
 goodness of fit S are based on F^2^, conventional R-factors R are based 
 on F, with F set to zero for negative F^2^. The threshold expression of 
 F^2^ > 2sigma(F^2^) is used only for calculating R-factors(gt) etc. and is 
 not relevant to the choice of reflections for refinement.  R-factors based 
 on F^2^ are statistically about twice as large as those based on F, and R- 
 factors based on ALL data will be even larger. 
; 
  
_refine_ls_structure_factor_coef  Fsqd 
_refine_ls_matrix_type            full 
_refine_ls_weighting_scheme       calc 
_refine_ls_weighting_details 
 'calc w=1/[\s^2^(Fo^2^)+(0.0744P)^2^+0.0000P] where P=(Fo^2^+2Fc^2^)/3' 
_atom_sites_solution_primary      direct 
_atom_sites_solution_secondary    difmap 
_atom_sites_solution_hydrogens    geom 
_refine_ls_hydrogen_treatment     mixed 
_refine_ls_extinction_method      SHELXL 
_refine_ls_extinction_coef        0.056(5) 
_refine_ls_extinction_expression 
 'Fc^*^=kFc[1+0.001xFc^2^\l^3^/sin(2\q)]^-1/4^' 
_refine_ls_abs_structure_details 
 'Flack H D (1983), Acta Cryst. A39, 876-881' 
_refine_ls_abs_structure_Flack    -0.8(6) 
_refine_ls_number_reflns          2042 
_refine_ls_number_parameters      209 
_refine_ls_number_restraints      0 
_refine_ls_R_factor_all           0.2339 
_refine_ls_R_factor_gt            0.0666 
_refine_ls_wR_factor_ref          0.2074 
_refine_ls_wR_factor_gt           0.1517 
_refine_ls_goodness_of_fit_ref    0.941 
_refine_ls_restrained_S_all       0.941 
_refine_ls_shift/su_max           0.006 
_refine_ls_shift/su_mean          0.001 
  
loop_ 
 _atom_site_label 
 _atom_site_type_symbol 
 _atom_site_fract_x 
 _atom_site_fract_y 
 _atom_site_fract_z 
 _atom_site_U_iso_or_equiv 
 _atom_site_adp_type 
 _atom_site_occupancy 
 _atom_site_symmetry_multiplicity 
 _atom_site_calc_flag 
 _atom_site_refinement_flags 
 _atom_site_disorder_assembly 
 _atom_site_disorder_group 
N1 N 0.2124(10) 0.3988(7) -0.0156(3) 0.059(2) Uani 1 1 d . . . 
Si1 Si 0.1412(3) 0.7944(3) 0.10222(12) 0.0497(8) Uani 1 1 d . . . 
O1 O 0.3782(9) 0.3785(7) 0.1882(3) 0.079(2) Uani 1 1 d . . . 
O2 O 0.4385(8) 0.5553(7) 0.1354(3) 0.067(2) Uani 1 1 d . . . 
O3 O 0.1371(8) 0.6390(5) 0.0985(3) 0.0506(17) Uani 1 1 d . . . 
O4 O 0.2250(9) 0.2841(6) 0.0194(3) 0.070(2) Uani 1 1 d . . . 
C1 C 0.4814(15) 0.4836(11) 0.1873(5) 0.071(3) Uani 1 1 d . . . 
C2 C 0.6486(13) 0.4394(12) 0.1835(5) 0.093(4) Uani 1 1 d . . . 
H2A H 0.6605 0.3857 0.1496 0.139 Uiso 1 1 calc R . . 
H2B H 0.6751 0.3934 0.2188 0.139 Uiso 1 1 calc R . . 
H2C H 0.7185 0.5104 0.1797 0.139 Uiso 1 1 calc R . . 
C3 C 0.4522(16) 0.5695(11) 0.2398(4) 0.093(4) Uani 1 1 d . . . 
H3A H 0.3428 0.5961 0.2399 0.140 Uiso 1 1 calc R . . 
H3B H 0.5204 0.6418 0.2369 0.140 Uiso 1 1 calc R . . 
H3C H 0.4750 0.5251 0.2759 0.140 Uiso 1 1 calc R . . 
C4 C 0.2504(14) 0.4000(9) 0.1461(4) 0.060(3) Uani 1 1 d . . . 
H4A H 0.1646 0.4487 0.1646 0.073 Uiso 1 1 calc R . . 
C5 C 0.1867(13) 0.2749(10) 0.1238(4) 0.073(3) Uani 1 1 d . . . 
H5A H 0.2747 0.2159 0.1211 0.087 Uiso 1 1 calc R . . 
H5B H 0.1118 0.2421 0.1527 0.087 Uiso 1 1 calc R . . 
C6 C 0.1053(11) 0.2819(10) 0.0646(5) 0.063(3) Uani 1 1 d . . . 
H6A H 0.0375 0.2077 0.0592 0.075 Uiso 1 1 calc R . . 
C7 C 0.0052(12) 0.4009(9) 0.0559(4) 0.062(3) Uani 1 1 d . . . 
H7A H -0.0903 0.3836 0.0330 0.075 Uiso 1 1 calc R . . 
H7B H -0.0250 0.4374 0.0937 0.075 Uiso 1 1 calc R . . 
C8 C 0.1180(12) 0.4867(8) 0.0222(4) 0.059(3) Uani 1 1 d . . . 
H8A H 0.0569 0.5444 -0.0029 0.070 Uiso 1 1 calc R . . 
C9 C 0.2323(11) 0.5617(8) 0.0621(4) 0.045(2) Uani 1 1 d . . . 
H9A H 0.2999 0.6150 0.0371 0.053 Uiso 1 1 calc R . . 
C10 C 0.3380(10) 0.4800(8) 0.1008(4) 0.048(2) Uani 1 1 d . . . 
H10A H 0.4030 0.4253 0.0755 0.058 Uiso 1 1 calc R . . 
C11 C 0.1230(14) 0.8630(9) 0.0264(4) 0.085(4) Uani 1 1 d . . . 
H11A H 0.0246 0.8360 0.0088 0.127 Uiso 1 1 calc R . . 
H11B H 0.2108 0.8351 0.0024 0.127 Uiso 1 1 calc R . . 
H11C H 0.1244 0.9530 0.0290 0.127 Uiso 1 1 calc R . . 
C12 C 0.3318(12) 0.8515(10) 0.1327(5) 0.071(3) Uani 1 1 d . . . 
H12A H 0.3464 0.8183 0.1720 0.107 Uiso 1 1 calc R . . 
H12B H 0.3304 0.9417 0.1344 0.107 Uiso 1 1 calc R . . 
H12C H 0.4179 0.8242 0.1078 0.107 Uiso 1 1 calc R . . 
C13 C -0.0304(12) 0.8313(9) 0.1521(4) 0.059(3) Uani 1 1 d . . . 
C14 C -0.0176(12) 0.7571(10) 0.2095(4) 0.086(4) Uani 1 1 d . . . 
H14A H -0.1069 0.7765 0.2345 0.128 Uiso 1 1 calc R . . 
H14B H 0.0795 0.7792 0.2296 0.128 Uiso 1 1 calc R . . 
H14C H -0.0172 0.6688 0.2008 0.128 Uiso 1 1 calc R . . 
C15 C -0.0350(15) 0.9756(10) 0.1655(5) 0.093(4) Uani 1 1 d . . . 
H15A H -0.1243 0.9940 0.1907 0.140 Uiso 1 1 calc R . . 
H15B H -0.0454 1.0213 0.1290 0.140 Uiso 1 1 calc R . . 
H15C H 0.0619 1.0000 0.1851 0.140 Uiso 1 1 calc R . . 
C16 C -0.1892(10) 0.7986(11) 0.1216(5) 0.079(3) Uani 1 1 d . . . 
H16A H -0.2762 0.8185 0.1476 0.118 Uiso 1 1 calc R . . 
H16B H -0.1913 0.7105 0.1124 0.118 Uiso 1 1 calc R . . 
H16C H -0.1993 0.8465 0.0857 0.118 Uiso 1 1 calc R . . 
C17 C 0.1235(14) 0.3652(10) -0.0693(4) 0.085(4) Uani 1 1 d . . . 
H17A H 0.1854 0.3076 -0.0926 0.127 Uiso 1 1 calc R . . 
H17B H 0.1026 0.4397 -0.0921 0.127 Uiso 1 1 calc R . . 
H17C H 0.0244 0.3264 -0.0585 0.127 Uiso 1 1 calc R . . 
  
loop_ 
 _atom_site_aniso_label 
 _atom_site_aniso_U_11 
 _atom_site_aniso_U_22 
 _atom_site_aniso_U_33 
 _atom_site_aniso_U_23 
 _atom_site_aniso_U_13 
 _atom_site_aniso_U_12 
N1 0.073(6) 0.054(5) 0.050(5) -0.015(4) -0.004(5) 0.005(5) 
Si1 0.0499(17) 0.0454(16) 0.0537(16) -0.0028(16) -0.0032(16) -0.0030(16) 
O1 0.087(6) 0.066(5) 0.085(6) 0.030(4) -0.023(5) -0.018(5) 
O2 0.066(5) 0.070(5) 0.064(4) 0.012(4) -0.016(4) -0.022(4) 
O3 0.048(4) 0.045(4) 0.059(4) -0.010(3) 0.014(4) -0.003(3) 
O4 0.096(5) 0.048(4) 0.067(5) -0.012(4) 0.017(5) 0.014(5) 
C1 0.073(9) 0.075(9) 0.066(8) 0.016(7) -0.023(7) -0.004(8) 
C2 0.074(9) 0.094(10) 0.110(10) 0.006(8) -0.012(8) 0.008(9) 
C3 0.126(12) 0.099(10) 0.056(7) 0.008(7) -0.012(8) 0.001(10) 
C4 0.072(7) 0.049(7) 0.060(6) 0.009(6) 0.012(6) -0.004(7) 
C5 0.092(9) 0.048(7) 0.079(7) 0.003(6) 0.033(7) -0.012(7) 
C6 0.057(7) 0.054(7) 0.076(7) -0.015(7) 0.010(6) -0.016(7) 
C7 0.047(6) 0.062(7) 0.078(7) -0.016(6) 0.012(6) -0.008(7) 
C8 0.055(7) 0.055(7) 0.066(6) -0.010(6) 0.001(6) 0.001(6) 
C9 0.037(5) 0.056(6) 0.041(5) -0.003(5) 0.010(5) 0.001(6) 
C10 0.039(5) 0.045(5) 0.061(6) 0.003(6) -0.008(6) 0.001(5) 
C11 0.101(10) 0.096(9) 0.057(6) 0.012(7) 0.012(8) 0.001(8) 
C12 0.068(8) 0.058(7) 0.088(8) 0.002(6) 0.006(7) -0.001(7) 
C13 0.066(8) 0.053(7) 0.060(7) 0.001(5) 0.006(6) 0.001(6) 
C14 0.090(8) 0.101(10) 0.065(7) -0.004(7) 0.014(7) 0.006(8) 
C15 0.094(10) 0.054(8) 0.132(10) -0.030(7) 0.033(9) 0.001(7) 
C16 0.056(7) 0.092(9) 0.089(8) 0.015(8) -0.003(6) -0.001(7) 
C17 0.109(10) 0.079(8) 0.066(7) -0.013(7) -0.011(8) -0.007(8) 
  
_geom_special_details 
; 
 All esds (except the esd in the dihedral angle between two l.s. planes) 
 are estimated using the full covariance matrix.  The cell esds are taken 
 into account individually in the estimation of esds in distances, angles 
 and torsion angles; correlations between esds in cell parameters are only 
 used when they are defined by crystal symmetry.  An approximate (isotropic) 
 treatment of cell esds is used for estimating esds involving l.s. planes. 
; 
  
loop_ 
 _geom_bond_atom_site_label_1 
 _geom_bond_atom_site_label_2 
 _geom_bond_distance 
 _geom_bond_site_symmetry_2 
 _geom_bond_publ_flag 
N1 O4 1.456(9) . ? 
N1 C17 1.467(11) . ? 
N1 C8 1.492(11) . ? 
Si1 O3 1.655(6) . ? 
Si1 C12 1.843(10) . ? 
Si1 C11 1.866(10) . ? 
Si1 C13 1.868(11) . ? 
O1 C1 1.414(12) . ? 
O1 C4 1.451(12) . ? 
O2 C10 1.401(10) . ? 
O2 C1 1.443(11) . ? 
O3 C9 1.412(9) . ? 
O4 C6 1.430(10) . ? 
C1 C2 1.481(14) . ? 
C1 C3 1.516(14) . ? 
C4 C10 1.519(12) . ? 
C4 C5 1.519(13) . ? 
C5 C6 1.503(13) . ? 
C6 C7 1.532(13) . ? 
C7 C8 1.518(12) . ? 
C8 C9 1.537(12) . ? 
C9 C10 1.517(12) . ? 
C13 C14 1.521(12) . ? 
C13 C16 1.539(13) . ? 
C13 C15 1.565(13) . ? 
  
loop_ 
 _geom_angle_atom_site_label_1 
 _geom_angle_atom_site_label_2 
 _geom_angle_atom_site_label_3 
 _geom_angle 
 _geom_angle_site_symmetry_1 
 _geom_angle_site_symmetry_3 
 _geom_angle_publ_flag 
O4 N1 C17 106.3(7) . . ? 
O4 N1 C8 104.7(7) . . ? 
C17 N1 C8 110.8(8) . . ? 
O3 Si1 C12 111.5(5) . . ? 
O3 Si1 C11 110.0(4) . . ? 
C12 Si1 C11 106.5(5) . . ? 
O3 Si1 C13 102.9(4) . . ? 
C12 Si1 C13 111.9(5) . . ? 
C11 Si1 C13 114.0(5) . . ? 
C1 O1 C4 108.5(7) . . ? 
C10 O2 C1 107.4(8) . . ? 
C9 O3 Si1 126.8(6) . . ? 
C6 O4 N1 110.4(7) . . ? 
O1 C1 O2 106.1(8) . . ? 
O1 C1 C2 109.2(10) . . ? 
O2 C1 C2 110.9(10) . . ? 
O1 C1 C3 111.5(10) . . ? 
O2 C1 C3 106.0(9) . . ? 
C2 C1 C3 112.9(10) . . ? 
O1 C4 C10 99.9(8) . . ? 
O1 C4 C5 109.8(8) . . ? 
C10 C4 C5 116.0(9) . . ? 
C6 C5 C4 114.2(9) . . ? 
O4 C6 C5 108.4(8) . . ? 
O4 C6 C7 106.3(8) . . ? 
C5 C6 C7 113.8(9) . . ? 
C8 C7 C6 102.7(8) . . ? 
N1 C8 C7 103.9(7) . . ? 
N1 C8 C9 109.2(8) . . ? 
C7 C8 C9 114.0(8) . . ? 
O3 C9 C10 109.2(7) . . ? 
O3 C9 C8 106.9(7) . . ? 
C10 C9 C8 113.8(8) . . ? 
O2 C10 C9 110.1(8) . . ? 
O2 C10 C4 103.7(8) . . ? 
C9 C10 C4 115.2(8) . . ? 
C14 C13 C16 109.0(9) . . ? 
C14 C13 C15 110.2(9) . . ? 
C16 C13 C15 106.7(10) . . ? 
C14 C13 Si1 110.5(7) . . ? 
C16 C13 Si1 110.5(7) . . ? 
C15 C13 Si1 110.0(8) . . ? 
  
_diffrn_measured_fraction_theta_max    0.998 
_diffrn_reflns_theta_full              25.00 
_diffrn_measured_fraction_theta_full   0.998 
_refine_diff_density_max    0.236 
_refine_diff_density_min   -0.314 
_refine_diff_density_rms    0.062 
  
